# Supplementary material
Source: HighWire-hosted journal article supplement (http://dmd.aspetjournals.org/highwire/filestream/66389/field_highwire_adjunct_files/0/Drug_Metab_Dispos-2014-1137.pdf)
Supplement: Drug_Metab_Dispos-2014-1137.pdf [file Drug_Metab_Dispos-2014-1137.pdf]

## Correction to “The Influence of Sex, Ethnicity, and CYP2B6 Genotype on Bupropion Metabolism as an Index of Hepatic CYP2B6 Activity in Humans”

In the above article [Ilic K, Hawke RL, Thirumaran RK, Schuetz EG, Hull JH, Kashuba AD, Stewart PW, Lindley CM, and Chen ML (2013) *Drug Metab Dispos* **41**:575–581; doi:10.1124/dmd.112.048108], the funding information is incomplete.

The correct funding information is as follows:

This work was supported by the National Institutes of Health National Institute of Allergy and Infectious Diseases [Grant 5-P30 A1050410]; and the Office of Women’s Health, U.S. Food and Drug Administration [Grant FRP#: FDA-SOL-05-00050]. K. I. was a drug research and development fellow (2006-2008) supported by GlaxoSmithKline.

The author regrets this error and any inconvenience it may have caused.
